RESEARCH ARTICLE

# First Report of Group CTX-M-9 Extended Spectrum Beta-Lactamases in *Escherichia coli* Isolates from Pediatric Patients in Mexico

Jocelin Merida-Vieyra<sup>1,2</sup>, Agustin De Colsa<sup>1,3</sup>, Yair Calderon Castañeda<sup>4</sup>, Patricia Arzate Barbosa<sup>4</sup>, Alejandra Aquino Andrade<sup>1\*</sup>

**1** Molecular Microbiology Laboratory, Instituto Nacional de Pediatría [INP], Mexico City, Mexico, **2** Microbiology Department, Escuela Nacional de Ciencias Biológicas, Instituto Politécnico Nacional, Mexico City, Mexico, **3** Pediatric Infectious Diseases Department, INP, Mexico City, Mexico, **4** Clinical Bacteriology Laboratory, INP, Mexico City, Mexico

\* [alejandra.aquino@infecito.mx](mailto:alejandra.aquino@infecito.mx)

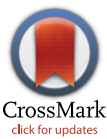

**OPEN ACCESS**

**Citation:** Merida-Vieyra J, De Colsa A, Calderon Castañeda Y, Arzate Barbosa P, Aquino Andrade A (2016) First Report of Group CTX-M-9 Extended Spectrum Beta-Lactamases in *Escherichia coli* Isolates from Pediatric Patients in Mexico. PLoS ONE 11(12): e0168608. doi:10.1371/journal.pone.0168608

**Editor:** Richard Paul, Institut Pasteur, FRANCE

**Received:** August 9, 2016

**Accepted:** December 2, 2016

**Published:** December 19, 2016

**Copyright:** © 2016 Merida-Vieyra et al. This is an open access article distributed under the terms of the [Creative Commons Attribution License](https://creativecommons.org/licenses/by/4.0/), which permits unrestricted use, distribution, and reproduction in any medium, provided the original author and source are credited.

**Data Availability Statement:** All relevant data are within the paper; it does not have supporting information files.

**Funding:** This work was supported by the National Council of Science and Technology (CONACYT) FOSISS 2012-1-181041. The funder had no role in study design, data collection and analysis, decision to publish, or preparation of the manuscript.

**Competing Interests:** The authors have declared that no competing interests exist.

## Abstract

The aim of this study was to identify the presence of group CTX-M-9 extended spectrum beta-lactamases (ESBL) in clinical *Escherichia coli* isolates from pediatric patients. A total of 404 non-repeated positive ESBL *E. coli* isolates were collected from documented clinical infections in pediatric patients over a 2-year period. The identification and susceptibility profiles were determined using an automated system. Isolates that suggested ESBL production based on their resistance profiles to third and fourth generation cephalosporin and monobactam were selected. ESBL production was phenotypically confirmed using a diffusion method with cefotaxime and ceftazidime discs alone and in combination with clavulanic acid. *bla*<sub>ESBL</sub> gene identification was performed through PCR amplification and sequencing. Pulsed Field Gel Electrophoresis (PFGE) and Multilocus Sequence Typing (MLST) were performed to establish the clonal relationships of the *E. coli* isolates. CTX-M-9-type ESBLs were detected in 2.5% of the isolates. The subtypes corresponded to *bla*<sub>CTX-M-14</sub> (n = 4) and *bla*<sub>CTX-M-27</sub> (n = 6). Additionally, coexistence with other beta-lactamases was observed. A clonal relationship was established in three isolates; the rest were classified as non-related. We found seven different sequence type (ST) in CTX-M-9-producing *E. coli* isolates. ST38 was the most frequent. This study is the first report in Mexico to document the presence of group CTX-M-9 ESBLs in *E. coli* isolates from pediatric patients.

## Introduction

Nosocomial infections constitute one of the most important problems of medical care, which do not only increase morbidity-mortality indices, but also the total cost of healthcare. Hospitalized patients in the intensive care units (ICU) are usually more susceptible to these kinds of infections. A prolonged hospital stay, invasive procedures and total parenteral nutrition are some of the principal risk factors for the development of nosocomial infections in pediatric patients [1].

The prevalence of nosocomial infections in pediatric intensive care units (PICUs) has been reported to be 6–12% and 10–25% in neonatal intensive care units (NICUs) [2]. The

Enterobacteriaceae are one of the most frequent group of bacteria causing these infections. The selection pressure exerted by the overuse of antibiotics has produced the emergency of multi-drug resistant strains (MDR). Presently, the treatment options for the infections caused by MDR Enterobacteriaceae are limited [3].

*Escherichia coli* is one of the main pathogens that cause infections in both the hospital and community settings and constitutes the principal Enterobacteriaceae in pediatric patients. These infections include urinary tract infections, bacteremia, neonatal meningitis, gastroenteritis, pneumonia, and wound infections [4–6]. Beta-lactams are the most commonly used antibiotics in clinical settings for the treatment of various infections because of their bactericidal action, low toxicity and diverse spectrum. An increase in the resistance to extended-spectrum cephalosporins (ceftriaxone, cefotaxime and ceftazidime) has been observed in *E. coli* over the last two decades. This resistance is primarily due to the production of ESBL [7,8]. Among the different ESBL families, CTX-M has become the most prevalent worldwide [9]; both in nosocomial and community acquired infections, principally in urinary tract infections (UTI) [10]. To date, 172 allelic variants have been described for this enzyme [11]. This family is classified into six phylogenetic groups (CTX-M-1, CTX-M-2, CTX-M-8, CTX-M-9, CTX-M-25 and KLUC) according to amino acid sequence similarities [10]. CTX-M-1 and CTX-M-9 are the most frequently described groups, with CTX-M-15 the most common subtype worldwide, followed by CTX-M-14, CTX-M-2, CTX-M-3 and CTX-M-1 [12].

In an epidemiological surveillance report on antimicrobial susceptibility profile conducted in 11 Latin America countries in 2011, a prevalence of ESBL-Producing *E. coli* was 7–71% with an average of 37%. In Mexico, the prevalence was 71% [13]. In another surveillance study carried out by SENTRY program from 2011–2014 in 21 hospital centers, ESBL-producing *E. coli* prevalence was found to vary from 14.7 to 69.9%. In Mexico, the prevalence reported was 69.9% [14].

In 2014, a total of 5771 Enterobacteriaceae isolates were collected in 69 hospital centers in US as a part of the International Network for Optimal Resistance Monitoring (INFORM) program, 13.6% presented ESBL phenotype and of these, 14.5% was *E. coli*. The most common enzyme was CTX-M-15 (49.9%) followed by CTX-M-14 (20.5%) [15].

Another study by the SENTRY program, carried out in nine European countries in 2009–2011, evaluated 2544 Enterobacteriaceae isolates from ICU. 709 of this total were *E. coli* and ESBL phenotype was reported in 16.6% [16].

In Spain and some regions of Asia, CTX-M-9 is the predominant group [6,17]. In China, the presence of CTX-M-Producing *E. coli*, mainly the group CTX-M-9, in urinary tract infections was documented [18].

In South America, the group CTX-M has been found to reach endemic proportion [19]. In Colombia, there are reports of CTX-M-1 [20] while in Ecuador, CTX-M-1, CTX-M-2 and CTX-M-9 have been documented [21]. Group CTX-M-9 also has been described in Bolivia (43%), Argentina (6%) and Brazil (1.2%) [22–24]. In Mexico, several studies have reported the presence of group CTX-M-1 (subtype CTX-M-15) [25–29]. However, no studies have documented the molecular and epidemiological characteristics of CTX-M-9 ESBL-producing *E. coli* isolates in the pediatric population. The aim of this study was to describe the presence of group CTX-M-9 ESBL in *E. coli* isolates obtained from pediatric patients.

## Materials and Methods

### Isolate collection

During a two-year period (February 2013—January 2015), a total of 404 non-repeated *E. coli* isolates with ESBL phenotype were collected at the Instituto Nacional de Pediatría (INP), that

is a tertiary care hospital in Mexico City. These isolates were obtained from various clinical samples causing infections in pediatric patients (0–18 years of age) and were identified using the Phoenix<sup>®</sup> Automated Microbiology System (Becton Dickinson, USA).

### Ethics statement

The study was approved by INP Ethic Committee (reference number 066/2013). The Review Board exempted request for informed consent because the bacteria included in the study were obtained by routine procedures and did not affect the patients.

### Susceptibility tests

The susceptibility profiles of the isolates were determined using a Phoenix<sup>®</sup> Automated Microbiology System (Becton Dickinson, USA). The results were interpreted according to the guidelines of the Clinical and Laboratory Standards Institute (CLSI, 2015) [30]. The isolates were selected based on their resistance profiles to third generation (ceftriaxone and ceftazidime) and fourth generation (cefepime) cephalosporins and monobactams (aztreonam).

### ESBL confirmatory tests

The phenotypic detection of ESBL was performed by the combined disc method using sensidiscs of cefotaxime and ceftazidime alone or in combination with clavulanic acid according to the CLSI guidelines [30].

The presence of ESBL was confirmed by an increase of  $\geq 5$  mm in the diameter of the zone of inhibition for any agent tested in combination with clavulanic acid compared with the diameter of the zone of inhibition for the agent alone. *Klebsiella pneumoniae* ATCC 700603 and *E. coli* ATCC 25922 were used as the positive and negative controls, respectively.

### Molecular characterization of the genes encoding ESBL

DNA extraction was performed using a QIAamp<sup>®</sup> DNA Mini kit (QIAGEN, Hilden, Germany) following the manufacturer's instructions. The molecular detection of beta-lactamases (*bla*<sub>CTX-M-1</sub>, *bla*<sub>CTX-M-2</sub>, *bla*<sub>CTX-M-9</sub>, *bla*<sub>CTX-M8/25</sub>, *bla*<sub>TEM</sub> and *bla*<sub>SHV</sub>) was performed by end-point PCR using previously reported primers [31,32]. The reaction was performed in a GenAmp<sup>®</sup> PCR System 9700 (Applied Biosystems). The final volume of the reaction mixture was 25  $\mu$ L and contained 12.5  $\mu$ L of AmpliTaq Gold<sup>®</sup> 360 MasterMix (Applied Biosystems, Foster City, CA, USA) and 0.4 pmol/ $\mu$ L of the primers. The obtained fragments were purified and sequenced in an ABI Prism 310 analyzer. The sequences were analyzed with nBLAST program [33,34], and analyzed using multiple alignments with the BioEdit program v7.2.5.0 (Ibis Biosciences, Carlsbad, CA, USA) to determine the beta-lactamase subtype.

### Molecular typing

The clonal relationship of the isolates was determined using the pulse-field gel electrophoresis (PFGE) technique in a CHEF Mapper XA System (Bio-Rad Laboratories, Hercules, CA, USA) after digestion of the chromosomal DNA with 50 U of the XbaI restriction enzyme (Invitrogen, Carlsbad, CA, USA). The technique was performed by following the PulseNet *E. coli* O157:H7 protocol (CDC, Atlanta, GA, USA) [35]. *Salmonella enterica* serovar Braenderup ATCC BAA-664 was used as the molecular size marker. The gel was stained with ethidium bromide (10 mg/mL) and visualized with UV light in a gel imaging system. The patterns were interpreted using the Tenover criteria [36].

MLST analysis was performed by amplifying seven housekeeping genes (*adh*, *fumC*, *gyrB*, *icd*, *mdh*, *purA* and *recA*) with primers and conditions previously described [37]. The sequences were analyzed in the program and database available in the site <http://mlst.warwick.ac.uk/mlst/>.

## Results

The 404 *E. coli* isolates with ESBL patterns were positive for the phenotypic confirmatory test. Group CTX-M-9 ESBLs were detected in 2.5% of these isolates (n = 10). The resistance profile to beta-lactam of the isolates with CTX-M-9 is shown in Table 1.

The multiple sequence alignment revealed that CTX-M-14 (n = 4) and CTX-M-27 (n = 6) were the allelic variants found. Additionally, coexistence with other types of beta-lactamases was observed in five isolates (TEM-1, CTX-M-15 and CTX-M-79) (Table 1).

Regarding the molecular typing, we found that two isolates (EC579 and EC600) belonged to the same clone and were closely related to EC419. The rest of the isolates were classified as non-related (Fig 1). The isolates were obtained from different clinical samples (Table 2).

Seven different type sequences (ST) were found in ten CTX-M-9-producing *E. coli* isolates (Table 1). The most frequent was ST38 (n = 4). In three, the subtype CTX-M-27 was detected and CTX-M-14 in one. The three isolates with CTX-M-27 (EC419, EC579 and EC 600) were clonally related (Fig 1), while EC295 isolate did not show similarity in the profile obtained with PFGE. Two isolates were from the same patient; however, both have different ST (EC230-ST457 and EC326-ST69).

For the clinical and epidemiological analysis, we studied the relationship between the patients and the *E. coli* CTX-M-9. All infections were nosocomial. Eight of the ten patients had a chronic underlying pathology requiring previous hospitalization, whereas two patients were newly admitted to the hospital (EC600 and EC579) (Table 2). All the patients with the exception of one had received third generation cephalosporins in the previous three months, while four of them had also previously received carbapenems.

A total of 78% of the patients had some degree of immunosuppression. The main isolation sites were blood (30%) and secretions derived from skin and soft tissue infections (30%) (Table 2). The first isolate was reported in February 2013. In 2014, the highest number of

**Table 1. Resistance profile and Molecular Characteristics of the CTX-M-9-Producing *E. coli* Isolates.**

| Isolate | CRO         | CAZ | FEP | AZT | PTZ   | IMP | MEM   | ERT  | ESBL | beta-lactamases genes |     |         |         | Typing |        |
|---------|-------------|-----|-----|-----|-------|-----|-------|------|------|-----------------------|-----|---------|---------|--------|--------|
|         |             |     |     |     |       |     |       |      |      | TEM                   | SHV | CTX-M-1 | CTX-M-9 | PFGE   | MLST   |
|         | MIC (µg/mL) |     |     |     |       |     |       |      |      |                       |     |         |         |        |        |
| EC001   | ≥64         | 64  | >16 | >16 | 4/4   | ≤1  | ≤0.25 | ≤0.5 | +    | 1*                    | -   | 15      | 14      | NR     | ST942  |
| EC230   | ≥64         | 8   | >16 | 16  | 64/4  | ≤1  | ≤0.25 | ≤0.5 | +    | 1*                    | -   | 79      | 27      | NR     | ST457  |
| EC284   | 16          | 16  | 16  | 4   | ≤2/4  | ≤1  | ≤0.25 | ≤0.5 | +    | 1*                    | -   | -       | 27      | NR     | ST354  |
| EC295   | ≥64         | 4   | >16 | 8   | 4/4   | ≤1  | ≤0.25 | ≤0.5 | +    | -                     | -   | -       | 14      | NR     | ST38   |
| EC300   | ≥64         | 256 | >16 | >16 | >64/4 | ≤1  | ≤0.25 | ≤0.5 | +    | -                     | -   | 15      | 14      | NR     | ST5489 |
| EC326   | 16          | 8   | 8   | 8   | ≤2/4  | ≤1  | ≤0.25 | ≤0.5 | +    | -                     | -   | -       | 27      | NR     | ST69   |
| EC419   | ≥64         | 8   | >16 | 16  | ≤2/4  | ≤1  | ≤0.25 | ≤0.5 | +    | -                     | -   | -       | 27      | A2     | ST38   |
| EC579   | ≥64         | 8   | 8   | 8   | ≤2/4  | ≤1  | ≤0.25 | ≤0.5 | +    | -                     | -   | -       | 27      | A      | ST38   |
| EC600   | 16          | 8   | >16 | 16  | ≤2/4  | ≤1  | ≤0.25 | ≤0.5 | +    | -                     | -   | -       | 27      | A      | ST38   |
| EC719   | >32         | 2   | 16  | 2   | ≤2/4  | ≤1  | ≤0.25 | ≤0.5 | +    | 1*                    | -   | -       | 14      | NR     | ST648  |

CRO: ceftriaxone, CAZ: ceftazidime, FEP: cefepime, AZT: aztreonam, PTZ: piperacillin/tazobactam IMP: imipenem, MEM: meropenem, ERT: ertapenem, ESBL: extended spectrum beta-lactamases, NR: Non-Related. PFGE: Pulsed Field Gel Electrophoresis, MLST: Multilocus sequence  
\* non ESBL.

doi:10.1371/journal.pone.0168608.t001

C 1 C 2 C 3 C 4 C 5 C 6 C 7 C 8 C 9 C 10 C 11

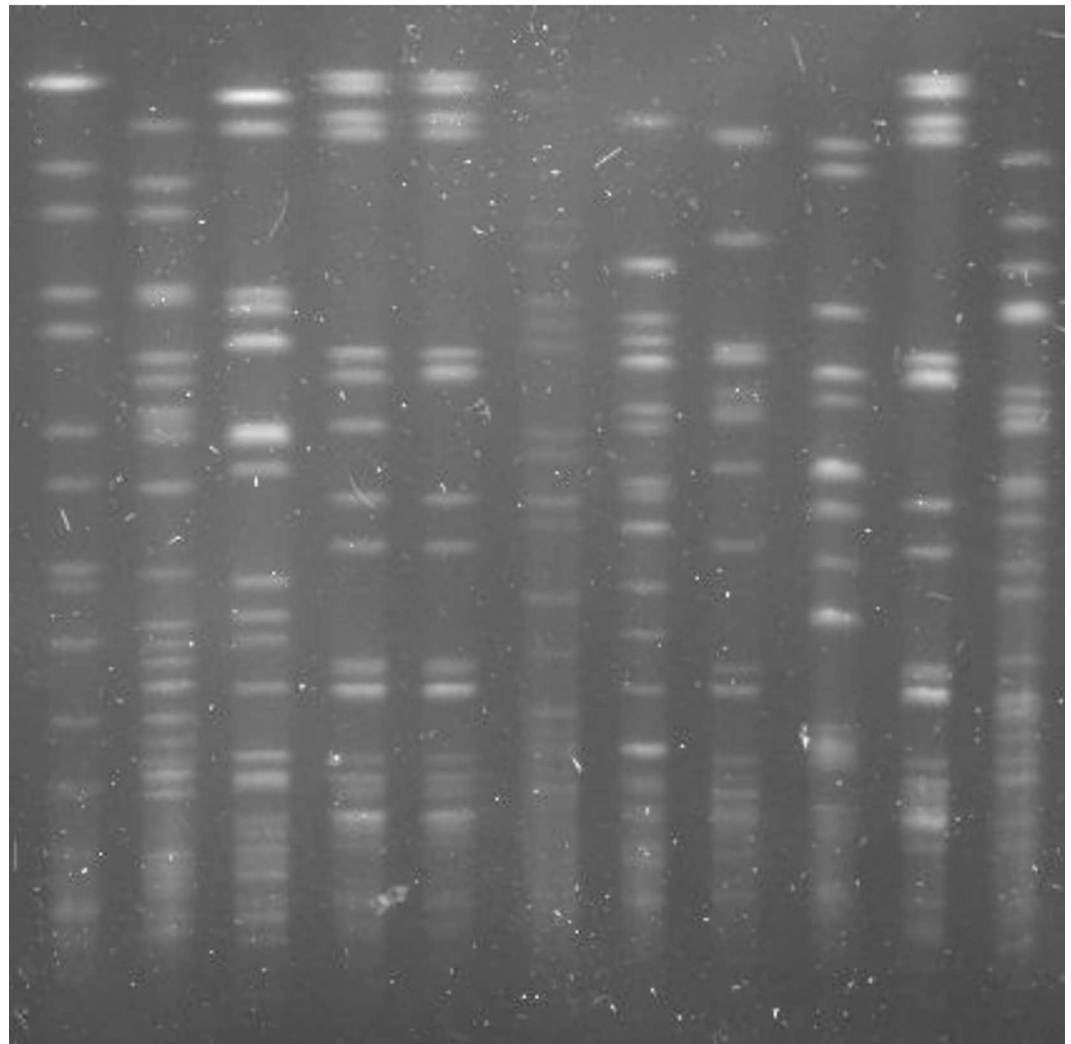

**Fig 1. PFGE of the CTX-M-9-Producing *E. coli* Isolates.** C1: *Salmonella enterica* serovar Braenderup ATCC BAA-664, C2: EC230, C3: EC326, C4: EC419, C5: EC579, C6: EC01, C7: EC284, C8: EC295, C9: EC300, C10: EC600, C11: EC719. The clonally related isolates are underlined: EC579 and EC600 (clone A) and EC419 (clone A2).

doi:10.1371/journal.pone.0168608.g001

isolates was reported ( $n = 7$ ). In January 2014, three patients coincided temporally (EC295, EC300, and EC326) but not in clinical services or enzymatic patterns.

Three cases were reported in the nephrology service, with two in the same patient at a three-month interval. The two infections were caused by a different enzyme subtype and by non-clonally related isolates: the first infection was caused by *E. coli* with a combination of CTX-M-79 and CTX-M-27 (EC230) and the second was caused by *E. coli* bearing CTX-M-27 (EC326). The other nephrology patient arrived almost seven months later and had a non-related CTX-M-14-producing isolate.

The two patients were infected after being hospitalized for the first time (EC579 and EC600). Both patients were admitted through the pre-hospitalization service in a two-week interval. These two isolates belonged to clone A, with subtype CTX-M-27, both corresponding

**Table 2. Epidemiological and Clinical Characteristics of the Patients with CTX-M-9-Producing *E. coli* Isolates.**

| Isolate | Gender | Age | Date     | Service    | Diagnosis                             | Infection                            | Sample           | Treatment                                      |                            | Outcome  |
|---------|--------|-----|----------|------------|---------------------------------------|--------------------------------------|------------------|------------------------------------------------|----------------------------|----------|
|         |        |     |          |            |                                       |                                      |                  | Previous*                                      | Definitive                 |          |
| EC001   | M      | 17  | 02/05/13 | ID         | ALL(relapse)                          | Septic shock                         | Blood culture    | Cefepime, ceftriaxone, meropenem               | Meropenem                  | Death    |
| EC230   | F**    | 4   | 11/06/13 | Nephrology | CNS,CKD                               | Odontogenic abscess                  | Abscess aspirate | Cefepime, ceftriaxone, cefuroxime              | Abscess drainage           | Alive    |
| EC284   | M      | 14  | 01/22/14 | Hematology | AML-M6                                | Septic shock, neutropenic, colitis   | Blood culture    | Ceftriaxone, Pip-Tazob, meropenem              | Meropenem                  | Alive    |
| EC295   | M      | 3   | 01/30/14 | Oncology   | Histiocytosis                         | Perianal cellulitis-abscess          | Secretion        | Ceftriaxone, cefepime, meropenem               | Cefepime, abscess drainage | Alive    |
| EC300   | M      | 3   | 01/30/14 | ID         | Lennox-Gastaut Syndrome, malnutrition | Pneumonia                            | BAL              | Ceftriaxone, cefepime                          | Meropenem                  | Alive    |
| EC326   | F**    | 4   | 02/21/14 | Nephrology | CNS,CKD                               | Hemodialysis, cateter side infection | Wound secretion  | Cefepime, ceftriaxone, cefuroxime              | Ceftriaxone, wound care    | Alive    |
| EC419   | F      | 1   | 06/13/14 | ID         | VUR grade IV, dysmorphic syndrome     | UTI (recurrent)                      | Urine            | Ceftriaxone, ertapenem (4 courses in 8 months) | Ertapenem                  | Alive    |
| EC579   | F      | 7   | 10/27/14 | Surgery    | Complicated appendicitis              | Surgical site infection              | Wound secretion  | Ceftriaxone                                    | Ciprofloxacin, wound care  | Alive    |
| EC600   | F      | 10  | 11/03/14 | Nephrology | CKD                                   | Peritonitis                          | Peritoneal fluid | None                                           | Ertapenem                  | Alive    |
| EC719   | F      | 2   | 01/23/15 | HSCTU      | Post-HSCT, AML-M5                     | CRBSI                                | Blood culture    | Cefepime                                       | Meropenem                  | Death*** |

\*ID: Infectious Diseases, Treatment with *beta-lactam antibiotics* in the previous three months

\*\* Same patient

\*\*\* Not related to *E. coli* infection, HSCTU: Hematopoietic Stem Cell Transplant Unit; ALL: Acute Lymphoblastic Leukemia; AML: Acute Myeloid Leukemia; CNS: Congenital Nephrotic Syndrome; CKD: Chronic Kidney Disease; VUR: Vesico-Ureteral Reflux; UTI: Urinary Tract Infection; CRBSI: Catheter-Related Blood Stream Infection; BAL: Bronchoalveolar Lavage, Pip-Tazob: piperacillin/tazobactam.

doi:10.1371/journal.pone.0168608.t002

ST38. Isolate EC419 was closely related to clone A (A2). However, there was no temporal or clinical service relationship between the isolates with this pattern.

In this series, six patients received definitive treatment with carbapenems and one of them with ciprofloxacin. In three of the infections, although carbapenems was not administered, the infection was resolved draining the abscess and local management of the wound (Table 2). Two of the patients died; however, one of them, death was not related with the *E. coli* CTX-M-9 infection. An important aspect to note is that one patient suffered two *E. coli* CTX-M-9 infections in two different times in a period of three months; however, *E. coli* isolates (ST457 and ST69) were not related (Table 1).

## Discussion

This study represents the first finding of group CTX-M-9 ESBLs in *E. coli* isolates from a pediatric population in Mexico. These enzymes were found in 2.5% of the isolates. The subtypes corresponded to CTX-M-14 and CTX-M-27. The CTX-M-1 group has been previously described in our country in several studies; the most frequent subtype found was CTX-M-15, reaching up 85% of *E. coli* isolates with ESBL phenotype [25–29]. Although CTX-M-15 is an



ESBL with a worldwide distribution, group CTX-M-9 has been reported to be the primary group in some regions of Europe and Asia. In Japan, 127 out of 165 *E. coli* ESBL isolates (77%) belonged to group CTX-M-9 [38]. In Spain, 96 cases of nosocomial bacteremia by ESBL-producing *E. coli* were reported in a study conducted in 13 hospitals. CTX-M-14 was present in 48% of these isolates, followed by CTX-M-27 (14%) [39]. In Korea, CTX-M-14 was found in 39% (n = 32) and CTX-M-15 in 33% (n = 27) of 82 ESBL-producing *E. coli*, whereas CTX-M-27 was found in only one isolate [40]. In China, 77 out of 197 ESBL-producing *E. coli* isolates were CTX-M-14 (39%), followed by CTX-M-15 with 64 isolates (32%) [41]. These findings indicate that CTX-M-14 and CTX-M-15 have become the predominant subtypes worldwide [42].

The presence of enzymes from group CTX-M-9 has also been reported in healthy individuals colonized with *E. coli*. In Spain, the prevalence of ESBL-producing *E. coli* was 5.06% in a study performed with colonized individuals, of which group CTX-M-9 was the most frequent (54%); CTX-M-14 (n = 74, 91.35%) was the main subtype of this group of enzymes [43]. In Bolivia, 43% of 60 *E. coli* ESBL isolates from healthy children belonged to group CTX-M-9 [24]. The presence of CTX-M-14 and CTX-M-27 has been reported in water, fish and fresh vegetables. These studies show that the community and the environment are also important reservoirs of CTX-M-9 enzyme producers. The identification of these reservoirs is important to identify possible transmission pathways for the acquisition of *E. coli* isolates producing this group of enzymes [44,45].

Coexistence with other ESBLs was only observed in five of the ten isolates producing group CTX-M-9 ESBLs. These examples corresponded to enzymes from group CTX-M-1 (CTX-M-15 and CTX-M-79). TEM-1 beta-lactamase was also found, although they were not extended spectrum. The coexistence of CTX-M-14 and SHV-12 has been reported in Korea [40], and the coexistence of CTX-M-14 and CTX-M-15 has been reported in the U.S. [46]. The dissemination of *bla*<sub>CTX-M-27</sub> typically occurs through plasmids of the IncF incompatibility group [47], whereas *bla*<sub>CTX-M-14</sub> is found in the IncK and IncH12 plasmids [48,49], *bla*<sub>CTX-M-14</sub> has been reported to be located in the chromosome [50]. CTX-M-27 can be differentiated from CTX-M-14 by the substitution of an amino acid, D240G. This change confers a higher hydrolytic activity against ceftazidime [51].

The dissemination of *E. coli* isolates producing CTX-M-9 is usually non-clonal. The association of CTX-M-14 with different sequence types has been reported [52, 53]. However, there are reports of some outbreaks produced by only one *E. coli* clone. In Spain, an outbreak in 2011 caused by a CTX-M-14-producing *E. coli* occurred in a neonatal intensive care unit. Out of 25 isolates producing CTX-M-14, 21 showed the same clonal pattern; the remaining four were classified as non-related. Using MLST, these *E. coli* isolates were shown to belong to clone ST23 [54]. The most frequent ST in CTX-M-9 producing isolates was ST38 (n = 4). Countries as China, Japan, Korea, Sweden, Netherlands and United Kingdom have been reported *E. coli* ST38 with the subtype CTX-M-14 in human infections [50, 55–59]. In Korea, ST38 was reported as the second most frequent ST in CTX-M-14 producing *E. coli* isolates of UTI. The rate of incidence of this ST reached 27.5% [59]. Also, it has been obtained from other sources like healthy human, water and pets [60–62].

*E. coli* ST648 associated to the CTX-M-14 enzyme, as seen in EC719 isolate, has been isolated in humans and other sources like water [58–60]. ST648 with CTX-M-9 has been isolated from animals like dogs, cats and birds [62–63].

*E. coli* ST354 and ST69 (EC230 and EC326, respectively) have also been detected in Korea and Hong Kong in *E. coli* with CTX-M-14 [58,59]. In our study, these ST were found associated to CTX-M-27.

In other regions of the world, some ST that were found in this analysis, have been associated with the presence of ESBL, non-ESBL and carbapenemases. In China, clinical isolates of *E. coli*

ST38, ST648 and ST69 with type 2 *Klebsiella pneumoniae* carbapenemase (KPC-2) and CTX-M-14 were described [64]. Likewise, *E. coli* ST69 with CTX-M-15 has been found in animals [62].

In Japan, the emergency of New Delhi metallo-beta-lactamase (NDM-1)-producing *E. coli* ST38 was reported in an isolate from blood culture [65]. In Korea, a patient was colonized with *E. coli* ST457 harboring carbapenemase OXA-232 [66]. In Australia and China, ST648 has been associated with the presence of CTX-M-1 and CTX-M-15 [60, 61]. In US, ST648 isolates from pets with CTX-M-15, CTX-M-1 and SHV-12 have been found [62]. In Australia, ST354 with CTX-M-9, CTX-M-1 and CTX-M-15; and ST457 with CTX-M-15 and CMY were isolated from dog feces [61]. These descriptions show that these ST are associated with the dispersion of other resistance mechanisms that does not only involve ESBL but other enzymes, like the carbapenemases; situation that can seriously complicate the treatment of *E. coli* infections.

The association of CTX-M-14 and CTX-M-27 with the pandemic clone ST131 has been reported [67]. Recently, the presence of *E. coli* ST131 with CTX-M-27 and *E. coli* ST226 with CTX-M-14 in humans has been described in Portugal [68].

We found four isolates with different ST with non-ESBL TEM-1 and three isolate with enzymes of the group CTX-M-1. In two of them, we found more than one beta-lactamase: EC01 (TEM-1 and CTX-M-15) and EC230 (TEM-1 and CTX-M-79).

This report is not intended to focus on the risk factors for acquiring *E. coli* with ESBL; however, in this series we found that eight out of ten patients had a chronic underlying pathology with long hospital stay or frequent admissions and discharges; thus, these patients were probably colonized previously. All except one patient, had previously received third generation cephalosporins. Indeed, the factors such as: previous use of antibiotics, prolonged hospital stay, neurological diseases and urinary tract anomalies among others, are associated with the acquisition of ESBL-producing Enterobacteriaceae [3,4]. Our results suggest the endogenous circulation of *E. coli* with these enzymatic patterns in our hospital. It is of the outmost to have an active surveillance program for timely detection of both infected and colonized patients by Enterobacteriaceae harboring emerging resistance mechanisms. Such program would optimize the prevention, control and management of these infections.

## Conclusions

This is the first report in Mexico of *E. coli* isolates obtained from pediatric patients producing group CTX-M-9 ESBLs (CTX-M-14 and CTX-M-27). The most frequent ST was ST38, which has been associated with the production of this type of enzymes in other countries. All of the infections were of nosocomial origin, but none of them were part of an outbreak. It is necessary to continue epidemiological and molecular surveillance to improve the prevention and control of infections associated with healthcare.

## Author Contributions

**Conceptualization:** AAA JMV AC.

**Data curation:** AAA JMV.

**Formal analysis:** AAA JMV.

**Funding acquisition:** AAA AC.

**Investigation:** AAA JMV AC.



**Methodology:** AAA JMV YCC PAB AC.

**Project administration:** AAA AC.

**Resources:** AAA PAB.

**Supervision:** AAA AC.

**Validation:** AAA JMV.

**Visualization:** AAA JMV AC YCC PAB.

**Writing – original draft:** AAA JMV AC.

**Writing – review & editing:** AAA JMV AC.

## References

1. Aktar F, Tekin R, Güneş A, Ülgen C, Tan İ, Ertuğrul S, et al. Determining the Independent Risk Factors and Mortality Rate of Nosocomial Infections in Pediatric Patients. *Biomed Res Int.* 2016; 2016: 7240864. doi: [10.1155/2016/7240864](https://doi.org/10.1155/2016/7240864) PMID: [26981536](https://pubmed.ncbi.nlm.nih.gov/26981536/)
2. McGrath EJ, Asmar BI. Nosocomial Infections and Multidrug-Resistant Bacterial Organisms in the Pediatric Intensive Care Unit. *Indian J Pediatr.* 2011; 78: 176–184. doi: [10.1007/s12098-010-0253-4](https://doi.org/10.1007/s12098-010-0253-4) PMID: [20936380](https://pubmed.ncbi.nlm.nih.gov/20936380/)
3. Lukac PJ, Bonomo RA, Logan LK. Extended-spectrum  $\beta$ -lactamase-producing Enterobacteriaceae in children: old foe, emerging threat. *Clin Infect Dis.* 2015; 60: 1389–1397. doi: [10.1093/cid/civ020](https://doi.org/10.1093/cid/civ020) PMID: [25595742](https://pubmed.ncbi.nlm.nih.gov/25595742/)
4. Murray TS, Peaper DR. The contribution of extended-spectrum beta-lactamases to multidrug-resistant infections in children. *Curr Opin Pediatr.* 2015; 27: 124–131 doi: [10.1097/MOP.000000000000182](https://doi.org/10.1097/MOP.000000000000182) PMID: [25565574](https://pubmed.ncbi.nlm.nih.gov/25565574/)
5. Allocati N, Masulli M, Alexeyev MF, Di Ilio C. *Escherichia coli* in Europe: an overview. *Int J Environ Res Public Health.* 2013; 10: 6235–6254. doi: [10.3390/ijerph10126235](https://doi.org/10.3390/ijerph10126235) PMID: [24287850](https://pubmed.ncbi.nlm.nih.gov/24287850/)
6. Bajaj P, Singh NS, Virdi JS. *Escherichia coli*  $\beta$ -lactamases: what really matters. *Front Microbiol.* 2016; 7: 417. doi: [10.3389/fmicb.2016.00417](https://doi.org/10.3389/fmicb.2016.00417) PMID: [27065978](https://pubmed.ncbi.nlm.nih.gov/27065978/)
7. Pitout JDD. Extraintestinal pathogenic *Escherichia coli*: a combination of virulence with antibiotic resistance. *Front Microbiol.* 2012; 3: 9. doi: [10.3389/fmicb.2012.00009](https://doi.org/10.3389/fmicb.2012.00009) PMID: [22294983](https://pubmed.ncbi.nlm.nih.gov/22294983/)
8. Fair RJ, Tor Y. Antibiotics and bacterial resistance in the 21st century. *Perspect Medicin Chem.* 2014; 6: 25–64. doi: [10.4137/PMC.S14459](https://doi.org/10.4137/PMC.S14459) PMID: [25232278](https://pubmed.ncbi.nlm.nih.gov/25232278/)
9. Cantón R, González-Alba JM, Galán JC. CTX-M enzymes: origin and diffusion. *Front Microbiol.* 2012; 3: 110. doi: [10.3389/fmicb.2012.00110](https://doi.org/10.3389/fmicb.2012.00110) PMID: [22485109](https://pubmed.ncbi.nlm.nih.gov/22485109/)
10. D'Andrea MM, Arena F, Pallecchi L, Rossolini GM. CTX-M-type beta-lactamases: a successful story of antibiotic resistance. *Int J Med Microbiol.* 2013; 303: 305–317
11. Bush K, Jacoby GA. Updated functional classification of beta-lactamases. *Antimicrobial Agents and Chemotherapy.* 2009; 54: 969–976. doi: [10.1128/AAC.01009-09](https://doi.org/10.1128/AAC.01009-09) PMID: [19995920](https://pubmed.ncbi.nlm.nih.gov/19995920/)
12. Zhao WH, Hu ZQ. Epidemiology and genetics of CTX-M extended-spectrum beta-lactamases in gram-negative bacteria. *Crit Rev Microbiol.* 2013; 39: 79–101 doi: [10.3109/1040841X.2012.691460](https://doi.org/10.3109/1040841X.2012.691460) PMID: [22697133](https://pubmed.ncbi.nlm.nih.gov/22697133/)
13. Jones RN, Guzman-Blanco M, Gales AC, Gallegos B, Castro AL, Martino MD, et al. Susceptibility rates in Latin American Nations: report from a regional resistance surveillance program (2011). *Braz J Infect Dis.* 2013; 17: 672–681. doi: [10.1016/j.bjid.2013.07.002](https://doi.org/10.1016/j.bjid.2013.07.002) PMID: [24120834](https://pubmed.ncbi.nlm.nih.gov/24120834/)
14. Sader HS, Castanheira M, Farrell DJ, Flamm RK, Mendes RE, Jones RN. Tigecycline antimicrobial activity tested against clinical bacteria from Latin American medical centres: results from SENTRY Antimicrobial Surveillance Program (2011–2014). *Int J Antimicrob Agents.* 2016; 48: 144–50. doi: [10.1016/j.ijantimicag.2016.04.021](https://doi.org/10.1016/j.ijantimicag.2016.04.021) PMID: [27291285](https://pubmed.ncbi.nlm.nih.gov/27291285/)
15. Castanheira M, Mendes RE, Jones RN, Sader HS. Changing of the Frequencies of  $\beta$ -Lactamase Genes Among Enterobacteriaceae in US Hospitals (2012–2014): Activity of Ceftazidime-Avibactam Tested against  $\beta$ -Lactamase-Producing Isolates. *Antimicrob Agents Chemother.* 2016; 60: 4770–7 doi: [10.1128/AAC.00540-16](https://doi.org/10.1128/AAC.00540-16) PMID: [27216075](https://pubmed.ncbi.nlm.nih.gov/27216075/)

16. Sader HS, Farrell DJ, Flamm RK, Jones RN. Antimicrobial susceptibility of Gram-negative organisms isolated from patients hospitalized in intensive care units in United States and European hospitals. *Diagn Microbiol Infect Dis*. 2014; 78: 443–8. doi: [10.1016/j.diagmicrobio.2013.11.025](https://doi.org/10.1016/j.diagmicrobio.2013.11.025) PMID: [24492025](https://pubmed.ncbi.nlm.nih.gov/24492025/)
17. Shaikh S, Fatima J, Shakil S, Rizvi SM, Kamal MA. Antibiotic resistance and extended spectrum beta-lactamases: types, epidemiology and treatment. *Saudi J Biol Sci*. 2015; 22: 90–101. doi: [10.1016/j.sjbs.2014.08.002](https://doi.org/10.1016/j.sjbs.2014.08.002) PMID: [25561890](https://pubmed.ncbi.nlm.nih.gov/25561890/)
18. Cheng MF, Chen WL, Hung WY, Huang IF, Chiou YH, Chen YS, et al. Emergence of extended spectrum-beta-lactamase-producing *Escherichia coli* O25b-ST131: a major community-acquired uropathogen in infants. *Pediatr Infect Dis J*. 2015; 34: 469–475 doi: [10.1097/INF.0000000000000623](https://doi.org/10.1097/INF.0000000000000623) PMID: [25879646](https://pubmed.ncbi.nlm.nih.gov/25879646/)
19. Salles M, Zurita J, Mejia C, Villegas V. Resistant Gram-negative infections in the outpatient setting in Latin America. *Epidemiol Infect*. 2013; 141:2459–2472 doi: [10.1017/S095026881300191X](https://doi.org/10.1017/S095026881300191X) PMID: [23924513](https://pubmed.ncbi.nlm.nih.gov/23924513/)
20. Blanco VM, Maya JJ, Correa A, Perenguez M, Muñoz JS, Mota G, et al. Prevalencia y factores de riesgo para infecciones del tracto urinario de inicio en la comunidad causadas por *Escherichia coli* productor de betalactamasas de espectro extendido en Colombia. *Enferm Infecc Microbiol Clin*. 2016; 34: 559–565
21. Calva DY, Toledo ZP, Ochoa SG, Arévalo AP, Ausili A. Detection and molecular characterization of beta-lactamase genes in clinical isolates of Gram-negative bacteria in Southern Ecuador. *Braz J Infect Dis*. 2016; 20: 627–630. doi: [10.1016/j.bjid.2016.07.001](https://doi.org/10.1016/j.bjid.2016.07.001) PMID: [27479052](https://pubmed.ncbi.nlm.nih.gov/27479052/)
22. Minarini LA, Poirel L, Trevisani NA, Darini AL, Nordmann P. Predominance of CTX-M-type extended-spectrum beta-lactamase genes among enterobacterial isolates from outpatients in Brazil. *Diagn Microbiol Infect Dis*. 2009; 65: 202–206. doi: [10.1016/j.diagmicrobio.2009.05.021](https://doi.org/10.1016/j.diagmicrobio.2009.05.021) PMID: [19748435](https://pubmed.ncbi.nlm.nih.gov/19748435/)
23. Sennati S, Santella G, Di Conza J, Pallecchi L, Pino M, Ghiglione B, et al. Changing epidemiology of extended-spectrum beta-lactamases in Argentina: emergence of CTX-M-15. *Antimicrob Agents Chemother*. 2012; 56: 6003–6005. doi: [10.1128/AAC.00745-12](https://doi.org/10.1128/AAC.00745-12) PMID: [22908156](https://pubmed.ncbi.nlm.nih.gov/22908156/)
24. Bartoloni A, Pallecchi L, Riccobono E, Mantella A, Magnelli D, Di Maggio T, et al. Relentless increase of resistance to fluoroquinolones and expanded-spectrum cephalosporins in *Escherichia coli*: 20 years of surveillance in resource-limited settings from Latin America. *Clin Microbiol Infect*. 2013; 19: 356–361. doi: [10.1111/j.1469-0691.2012.03807.x](https://doi.org/10.1111/j.1469-0691.2012.03807.x) PMID: [22414066](https://pubmed.ncbi.nlm.nih.gov/22414066/)
25. Garza-González E, Mendoza ISI, Llaca-Díaz JM, González GM. Molecular characterization and antimicrobial susceptibility of extended-spectrum  $\beta$ -lactamase-producing Enterobacteriaceae isolates at a tertiary-care centre in Monterrey, Mexico. *J Med Microbiol*. 2011; 60: 84–90. doi: [10.1099/jmm.0.022970-0](https://doi.org/10.1099/jmm.0.022970-0) PMID: [20930052](https://pubmed.ncbi.nlm.nih.gov/20930052/)
26. Morfin-Otero R, Mendoza-Olazarán S, Silva-Sánchez J, Rodríguez-Noriega E, Laca-Díaz J, Tinoco-Carrillo P, et al. Characterization of Enterobacteriaceae isolates obtained from a tertiary care hospital in Mexico, which produces extended-spectrum beta-lactamase. *Microb Drug Resist*. 2013; 19: 378–383. doi: [10.1089/mdr.2012.0263](https://doi.org/10.1089/mdr.2012.0263) PMID: [23725513](https://pubmed.ncbi.nlm.nih.gov/23725513/)
27. Silva-Sanchez J, Cruz-Trujillo E, Barrios H, Reyna-Flores F, Sanchez-Perez A, Garza-Ramos U, et al. Characterization of plasmid-mediated quinolone resistance (PMQR) genes in extended-spectrum beta-lactamase-producing Enterobacteriaceae pediatric clinical isolates in Mexico. *PLoS One*. 2013; 8: e77968. doi: [10.1371/journal.pone.0077968](https://doi.org/10.1371/journal.pone.0077968) PMID: [24147104](https://pubmed.ncbi.nlm.nih.gov/24147104/)
28. Cornejo-Juarez P, Suarez-Cuenca JA, Volkow-Fernandez P, Silva-Sanchez J, Barrios-Camacho H, Najera-Leon E, et al. Fecal ESBL *Escherichia coli* carriage as a risk factor for bacteremia in patients with hematological malignancies. *Support Care Cancer*. 2016; 24: 253–259. doi: [10.1007/s00520-015-2772-z](https://doi.org/10.1007/s00520-015-2772-z) PMID: [26014616](https://pubmed.ncbi.nlm.nih.gov/26014616/)
29. Miranda-Romero AL, Silva-Sanchez J, Garza-Ramos U, Barrios H, Sánchez-Pérez A, Reyna-Flores F. Molecular characterization of ESBL-producing *Escherichia coli* isolates from hospital- and community-acquired infections in NW Mexico. *Diagn Microbiol Infect Dis*. 2016; S0732-8893: 30330–3
30. Clinical Laboratory Standards Institute. Performance standards for antimicrobial susceptibility testing; 25th informational supplement M100-S25. Vol. 35. Pennsylvania, PA: CLSI Wayne; 2015.
31. Dallenne C, Da Costa A, Decre D, Favier C, Arlet G. Development of a set of multiplex PCR assays for the detection of genes encoding important beta-lactamases in Enterobacteriaceae. *J Antimicrob Chemother*. 2010; 65: 490–495. doi: [10.1093/jac/dkp498](https://doi.org/10.1093/jac/dkp498) PMID: [20071363](https://pubmed.ncbi.nlm.nih.gov/20071363/)
32. Alcantar-Curiel D, Tinoco JC, Gayosso C, Carlos A, Daza C, Perez-Prado MC, et al. Nosocomial bacteremia and urinary tract infections caused by extended-spectrum beta-lactamase-producing *Klebsiella pneumoniae* with plasmids carrying both SHV-5 and TLA-1 genes. *Clin Infect Dis*. 2004; 38: 1067–1074. doi: [10.1086/382354](https://doi.org/10.1086/382354) PMID: [15095209](https://pubmed.ncbi.nlm.nih.gov/15095209/)

33. Morgulis A, Coulouris G, Raytselis Y, Madden TL, Agarwala R, Schäffer AA. Database Indexing for Production MegaBLAST Searches. *Bioinformatics*. 2008; 24:1757–1764. doi: [10.1093/bioinformatics/btn322](https://doi.org/10.1093/bioinformatics/btn322) PMID: [18567917](https://pubmed.ncbi.nlm.nih.gov/18567917/)
34. Zhang Z, Schwartz S, Wagner L, Miller W. A greedy algorithm for aligning DNA sequences. *J Comput Biol*. 2000; 7: 203–14. doi: [10.1089/10665270050081478](https://doi.org/10.1089/10665270050081478) PMID: [10890397](https://pubmed.ncbi.nlm.nih.gov/10890397/)
35. Ribot EM, Fair MA, Gautom R, Cameron DN, Hunter SB, Swaminathan B, et al. Standardization of pulsed-field gel electrophoresis protocols for the subtyping of *Escherichia coli* O157:H7, *Salmonella*, and *Shigella* for PulseNet. *Foodborne Pathog Dis*. 2006; 3: 59–67. doi: [10.1089/fpd.2006.3.59](https://doi.org/10.1089/fpd.2006.3.59) PMID: [16602980](https://pubmed.ncbi.nlm.nih.gov/16602980/)
36. Tenover FC, Arbeit RD, Goering RV, Mickelsen PA, Murray BE, Persing DH, et al. Interpreting chromosomal DNA restriction patterns produced by pulsed-field gel electrophoresis: criteria for bacterial strain typing. *J Clin Microbiol*. 1995; 33: 2233–2239. PMID: [7494007](https://pubmed.ncbi.nlm.nih.gov/7494007/)
37. Wirth T, Falush D, Lan R, Colles F, Mensa P, Wieler LH, et al. Sex and virulence in *Escherichia coli*: an evolutionary perspective. 2006. *Mol. Microbiol*. 60(5):1136–1151. doi: [10.1111/j.1365-2958.2006.05172.x](https://doi.org/10.1111/j.1365-2958.2006.05172.x) PMID: [16689791](https://pubmed.ncbi.nlm.nih.gov/16689791/)
38. Shibasaki M, Komatsu M, Sueyoshi N, Maeda M, Uchida T, Yonezawa H, et al. Community spread of extended-spectrum beta-lactamase-producing bacteria detected in social insurance hospitals throughout Japan. *J Infect Chemother*. 2016; 22: 395–399. doi: [10.1016/j.jiac.2016.03.001](https://doi.org/10.1016/j.jiac.2016.03.001) PMID: [27066881](https://pubmed.ncbi.nlm.nih.gov/27066881/)
39. Rodriguez-Baño J, Picon E, Gijon P, Hernandez JR, Cisneros JM, Pena C, et al. Risk factors and prognosis of nosocomial bloodstream infections caused by extended-spectrum-beta-lactamase-producing *Escherichia coli*. *J Clin Microbiol*. 2010; 48: 1726–1731. doi: [10.1128/JCM.02353-09](https://doi.org/10.1128/JCM.02353-09) PMID: [20181897](https://pubmed.ncbi.nlm.nih.gov/20181897/)
40. Song W, Lee H, Lee K, Jeong SH, Bae IK, Kim JS, et al. CTX-M-14 and CTX-M-15 enzymes are the dominant type of extended-spectrum beta-lactamase in clinical isolates of *Escherichia coli* from Korea. *J Med Microbiol*. 2009; 58: 261–266 doi: [10.1099/jmm.0.004507-0](https://doi.org/10.1099/jmm.0.004507-0) PMID: [19141747](https://pubmed.ncbi.nlm.nih.gov/19141747/)
41. Liu H, Wang Y, Wang G, Xing Q, Shao L, Dong X, et al. The prevalence of *Escherichia coli* strains with extended spectrum beta-lactamases isolated in China. *Front Microbiol*. 2015; 6: 335. doi: [10.3389/fmicb.2015.00335](https://doi.org/10.3389/fmicb.2015.00335) PMID: [25954262](https://pubmed.ncbi.nlm.nih.gov/25954262/)
42. Bush K. Proliferation and significance of clinically relevant beta-lactamases. *Ann N Y Acad Sci*. 2013; 1277: 84–90. doi: [10.1111/nyas.12023](https://doi.org/10.1111/nyas.12023) PMID: [23346859](https://pubmed.ncbi.nlm.nih.gov/23346859/)
43. Garrido A, Seral C, Gude MJ, Casado C, Gonzalez-Dominguez M, Saenz Y, et al. Characterization of plasmid-mediated beta-lactamases in fecal colonizing patients in the hospital and community setting in Spain. *Microb Drug Resist*. 2014; 20: 301–304. doi: [10.1089/mdr.2013.0109](https://doi.org/10.1089/mdr.2013.0109) PMID: [24328895](https://pubmed.ncbi.nlm.nih.gov/24328895/)
44. Muller A, Stephan R, Nuesch-Inderbinen M. Distribution of virulence factors in ESBL producing *Escherichia coli* isolated from the environment, livestock, food and humans. *Sci Total Environ*. 2016; 541: 667–672. doi: [10.1016/j.scitotenv.2015.09.135](https://doi.org/10.1016/j.scitotenv.2015.09.135) PMID: [26437344](https://pubmed.ncbi.nlm.nih.gov/26437344/)
45. Zurfluh K, Nuesch-Inderbinen M, Morach M, Zihler BA, Hachler H, Stephan R, et al. Extended-spectrum-beta-lactamase-producing Enterobacteriaceae isolated from vegetables imported from the Dominican republic, India, Thailand, and Vietnam. *Appl Environ Microbiol*. 2015; 81: 3115–3120. doi: [10.1128/AEM.00258-15](https://doi.org/10.1128/AEM.00258-15) PMID: [25724954](https://pubmed.ncbi.nlm.nih.gov/25724954/)
46. Hayakawa K, Gattu S, Marchaim D, Bhargava A, Palla M, Alshabani K, et al. Epidemiology and risk factors for isolation of *Escherichia coli* producing CTX-M-type extended-spectrum beta-lactamase in a large U.S. Medical center. *Antimicrob Agents Chemother*. 2013; 57: 4010–4018. doi: [10.1128/AAC.02516-12](https://doi.org/10.1128/AAC.02516-12) PMID: [23752516](https://pubmed.ncbi.nlm.nih.gov/23752516/)
47. Schaufler K, Semmler T, Pickard DJ, de Toro M, de la Cruz F, Wieler LH, et al. Carriage of extended-spectrum beta-lactamase-plasmids does not reduce fitness but enhances virulence in some strains of pandemic *E. coli* lineages. *Front Microbiol*. 2016; 7: 336. doi: [10.3389/fmicb.2016.00336](https://doi.org/10.3389/fmicb.2016.00336) PMID: [27014251](https://pubmed.ncbi.nlm.nih.gov/27014251/)
48. Dhanji H, Khan P, Cottell JL, Piddock LJV, Zhang J, Livermore DM, et al. Dissemination of pCT-like incK plasmids harboring CTX-M-14 extended-spectrum  $\beta$ -lactamase among 18 clinical *Escherichia coli* isolates in the United Kingdom. *Antimicrob Agents Chemother*. 2012; 56: 3376–3377. doi: [10.1128/AAC.00313-12](https://doi.org/10.1128/AAC.00313-12) PMID: [22450980](https://pubmed.ncbi.nlm.nih.gov/22450980/)
49. Navarro F, Mesa RJ, Miro E, Gomez L, Mirelis B, Coll P, et al. Evidence for convergent evolution of CTX-M-14 ESBL in *Escherichia coli* and its prevalence. *FEMS Microbiol Lett*. 2007; 273: 120–123. doi: [10.1111/j.1574-6968.2007.00791.x](https://doi.org/10.1111/j.1574-6968.2007.00791.x) PMID: [17559406](https://pubmed.ncbi.nlm.nih.gov/17559406/)
50. Rodríguez I, Thomas K, Van Essen A, Schink AK, Day M, Chattaway M, et al. Chromosomal location of blaCTX-M genes in clinical isolates of *Escherichia coli* from Germany, The Netherlands and the UK. *Int J Antimicrob Agents*. 2014; 43: 553–557. doi: [10.1016/j.ijantimicag.2014.02.019](https://doi.org/10.1016/j.ijantimicag.2014.02.019) PMID: [24816185](https://pubmed.ncbi.nlm.nih.gov/24816185/)
51. Bonnet R, Recule C, Baraduc R, Chanal C, Sirot D, De Champs C, et al. Effect of D240G substitution in a novel ESBL CTX-M-27. *J Antimicrob Chemother*. 2003; 52: 29–35. doi: [10.1093/jac/dkg256](https://doi.org/10.1093/jac/dkg256) PMID: [12775683](https://pubmed.ncbi.nlm.nih.gov/12775683/)

52. Oteo J, Diestra K, Juan C, Bautista V, Novais A, Perez-Vazquez M, et al. Extended-spectrum beta-lactamase-producing *Escherichia coli* in Spain belong to a large variety of multilocus sequence typing types, including ST10 complex/A, ST23 complex/A and ST131/B2. *Int J Antimicrob Agents*. 2009; 34: 173–176 doi: [10.1016/j.ijantimicag.2009.03.006](https://doi.org/10.1016/j.ijantimicag.2009.03.006) PMID: [19464856](https://pubmed.ncbi.nlm.nih.gov/19464856/)
53. Mora A, Blanco M, Lopez C, Mamani R, Blanco JE, Alonso MP, et al. Emergence of clonal groups O1: HNM-D-ST59, O15:H1-D-ST393, O20:H34/HNM-D-ST354, O25b:H4-B2-ST131 and ONT:H21,42-B1-ST101 among CTX-M-14-producing *Escherichia coli* clinical isolates in Galicia, Northwest Spain. *Int J Antimicrob Agents*. 2011; 37: 16–21. doi: [10.1016/j.ijantimicag.2010.09.012](https://doi.org/10.1016/j.ijantimicag.2010.09.012) PMID: [21075606](https://pubmed.ncbi.nlm.nih.gov/21075606/)
54. Oteo J, Cercenado E, Fernandez-Romero S, Saez D, Padilla B, Zamora E, et al. Extended-spectrum-beta-lactamase-producing *Escherichia coli* as a cause of pediatric infections: report of a neonatal intensive care unit outbreak due to a CTX-M-14-producing strain. *Antimicrob Agents Chemother*. 2012; 56: 54–58. doi: [10.1128/AAC.05103-11](https://doi.org/10.1128/AAC.05103-11) PMID: [21986825](https://pubmed.ncbi.nlm.nih.gov/21986825/)
55. Suzuki S, Shibata N, Yamane K, Wachino J, Ito K, Arakawa Y, et al. Change in the prevalence of extended-spectrum-beta-lactamase-producing *Escherichia coli* in Japan by clonal spread. *J Antimicrob Chemother*. 2009; 63: 72–79. doi: [10.1093/jac/dkn463](https://doi.org/10.1093/jac/dkn463) PMID: [19004839](https://pubmed.ncbi.nlm.nih.gov/19004839/)
56. Brolund A, Edquist PJ, Mäkitalo B, Olsson-Liljequist B, Söderblom T, Wisell KT, et al. Epidemiology of extended-spectrum  $\beta$ -lactamase-producing *Escherichia coli* in Sweden 2007–2011. *Clin Microbiol Infect*. 2014; 20: O344–52. doi: [10.1111/1469-0691.12413](https://doi.org/10.1111/1469-0691.12413) PMID: [24118431](https://pubmed.ncbi.nlm.nih.gov/24118431/)
57. Zhang J, Zheng B, Zhao L, Wei Z, Ji J, Li L, et al. Nation wide high prevalence of CTX-M and an increase of CTX-M-55 in *Escherichia coli* isolated from patients with community-onset infections in Chinese county hospitals. *BMC Infect Dis*. 2014; 14: 659. doi: [10.1186/s12879-014-0659-0](https://doi.org/10.1186/s12879-014-0659-0) PMID: [25466590](https://pubmed.ncbi.nlm.nih.gov/25466590/)
58. Ho PL, Yeung MK, Lo WU, Tse H, Li Z, Lai EL, et al. Predominance of pHK01-like incompatibility group FII plasmids encoding CTX-M-14 among extended-spectrum beta-lactamase-producing *Escherichia coli* in Hong Kong, 1996–2008. *Diagn Microbiol Infect Dis*. 2012; 73: 182–6. doi: [10.1016/j.diagmicrobio.2012.03.009](https://doi.org/10.1016/j.diagmicrobio.2012.03.009) PMID: [22521053](https://pubmed.ncbi.nlm.nih.gov/22521053/)
59. Kim S, Sung JY, Cho HH, Kwon KC, Koo SH. Characteristics of the Molecular Epidemiology of CTX-M-Producing *Escherichia coli* Isolated from a Tertiary Hospital in Daejeon, Korea. *J Microbiol Biotechnol*. 2016; 26: 1643–9. doi: [10.4014/jmb.1603.03063](https://doi.org/10.4014/jmb.1603.03063) PMID: [27363476](https://pubmed.ncbi.nlm.nih.gov/27363476/)
60. Hu YY, Cai JC, Zhou HW, Chi D, Zhang XF, Chen WL, et al. Molecular typing of CTX-M-producing *Escherichia coli* isolates from environmental water, swine feces, specimens from healthy humans, and human patients. *Appl Environ Microbiol*. 2013; 79: 5988–96. doi: [10.1128/AEM.01740-13](https://doi.org/10.1128/AEM.01740-13) PMID: [23892737](https://pubmed.ncbi.nlm.nih.gov/23892737/)
61. Guo S, Wakeham D, Brouwers HJ, Cobbold RN, Abraham S, Mollinger JL, Johnson JR, Chapman TA, Gordon DM, Barrs VR, Trott DJ. Human-associated fluoroquinolone-resistant *Escherichia coli* clonal lineages, including ST354, isolated from canine feces and extraintestinal infections in Australia. *Microbes Infect*. 2015; 17: 266–274. doi: [10.1016/j.micinf.2014.12.016](https://doi.org/10.1016/j.micinf.2014.12.016) PMID: [25576024](https://pubmed.ncbi.nlm.nih.gov/25576024/)
62. Liu X, Thungrat K, Boothe DM. Occurrence of OXA-48 Carbapenemase and Other  $\beta$ -Lactamase Genes in ESBL-Producing Multidrug Resistant *Escherichia coli* from Dogs and Cats in the United States, 2009–2013. *Front Microbiol*. 2016; 7: 1057. doi: [10.3389/fmicb.2016.01057](https://doi.org/10.3389/fmicb.2016.01057) PMID: [27462301](https://pubmed.ncbi.nlm.nih.gov/27462301/)
63. Guenther S, Aschenbrenner K, Stamm I, Bethe A, Semmler T, Stubbe A, et al. Comparable high rates of extended-spectrum-beta-lactamase-producing *Escherichia coli* in birds of prey from Germany and Mongolia. *PLoS One*. 2012; 7: e53039. doi: [10.1371/journal.pone.0053039](https://doi.org/10.1371/journal.pone.0053039) PMID: [23300857](https://pubmed.ncbi.nlm.nih.gov/23300857/)
64. Cai JC, Zhang R, Hu YY, Zhou HW, Chen GX. Emergence of *Escherichia coli* sequence type 131 isolates producing KPC-2 carbapenemase in China. *Antimicrob Agents Chemother*. 2014; 58: 1146–52. doi: [10.1128/AAC.00912-13](https://doi.org/10.1128/AAC.00912-13) PMID: [24323475](https://pubmed.ncbi.nlm.nih.gov/24323475/)
65. Yamamoto T, Takano T, Iwao Y, Hishinuma A. Emergence of NDM-1-positive capsulated *Escherichia coli* with high resistance to serum killing in Japan. *J Infect Chemother*. 2011; 17: 435–9. doi: [10.1007/s10156-011-0232-3](https://doi.org/10.1007/s10156-011-0232-3) PMID: [21437680](https://pubmed.ncbi.nlm.nih.gov/21437680/)
66. Jeong SH, Lee KM, Lee J, Bae IK, Kim JS, Kim HS, et al. Clonal and horizontal spread of the blaOXA-232 gene among Enterobacteriaceae in a Korean hospital. *Diagn Microbiol Infect Dis*. 2015; 82: 70–2. doi: [10.1016/j.diagmicrobio.2015.02.001](https://doi.org/10.1016/j.diagmicrobio.2015.02.001) PMID: [25702524](https://pubmed.ncbi.nlm.nih.gov/25702524/)
67. Stoesser N, Sheppard AE, Pankhurst L, De Maio N, Moore CE, Sebra R, et al. Evolutionary history of the global emergence of the *Escherichia coli* epidemic clone ST131. *MBio*. 2016; 7: e02162. doi: [10.1128/mBio.02162-15](https://doi.org/10.1128/mBio.02162-15) PMID: [27006459](https://pubmed.ncbi.nlm.nih.gov/27006459/)
68. Rodrigues C, Machado E, Fernandes S, Peixe L, Novais A. An update on faecal carriage of ESBL-producing Enterobacteriaceae by portuguese healthy humans: detection of the H30 subclone of B2-ST131 *Escherichia coli* producing CTX-M-27. *J Antimicrob Chemother*. 2016; 71: 1120–1122. doi: [10.1093/jac/dkv443](https://doi.org/10.1093/jac/dkv443) PMID: [26747102](https://pubmed.ncbi.nlm.nih.gov/26747102/)
